# Supplementary material for: The role of broadleaved hedgerows and landscape composition for biodiversity conservation in a pine plantation context
Source: Research Square preprint supplement (doi:10.21203/rs.3.rs-7131998/v1), 2025-10-02
Supplement: Supplementary file 1 [file c156de28e53350d66ab379d7.docx]

# Supplementary Material

**The role of broadleaved hedgerows and landscape composition for biodiversity conservation in a pine plantation context**

Nattan Plata, Eric Allanbc, Severin Jouveaua, Olivier Bonnarda, Jean-Baptiste Rivoala, Jennifer Dudita, Tom Barliera, Yohan Charbonnierd, Mathieu Sannierd, Irene Garcia-Celadad, Inge van Haldera & Hervé Jactela

**Affiliations:**

aUniversity of Bordeaux, INRAE, BIOGECO, 69 route d’Arcachon 33610, Cestas, France

[nattan.plat@hotmail.com](mailto:nattan.plat@hotmail.com); [severin.jouveau@inrae.fr](mailto:severin.jouveau@inrae.fr) ; [olivier.bonnard@inrae.fr](mailto:olivier.bonnard@inrae.fr) ; [jean-baptiste.rivoal@inrae.fr](mailto:jean-baptiste.rivoal@inrae.fr) ; [jennifer.dudit@inrae.fr](mailto:jennifer.dudit@inrae.fr) ; [tom.barlier@inrae.fr](mailto:tom.barlier@inrae.fr) ; [inge.van-halder@inrae.fr](mailto:inge.van-halder@inrae.fr); [herve.jactel@inrae.fr](mailto:herve.jactel@inrae.fr)

bInstitute for Plant Sciences (IPS), University of Bern, Bern, Switzerland

cCentre for Development and Environment, University of Bern, Bern, Switzerland

[eric.allan@unibe.ch](mailto:eric.allan@unibe.ch)

dLigue pour la Protection des Oiseaux, Bourrou, France

[yohan.charbonnier@lpo.fr](mailto:yohan.charbonnier@lpo.fr)

ORCID number of the authors:

Nattan Plat: 0009-0002-8272-8013 Eric Allan: 0000-0001-9641-9436

Inge van Halder: 0000-0003-3244-4338 Hervé Jactel: 0000-0002-8106-5310

Tom Barlier: 0009-0005-7854-3122

**Corresponding author**: Nattan Plat, +33638390540, [nattan.plat@hotmail.com](mailto:nattan.plat@hotmail.com)


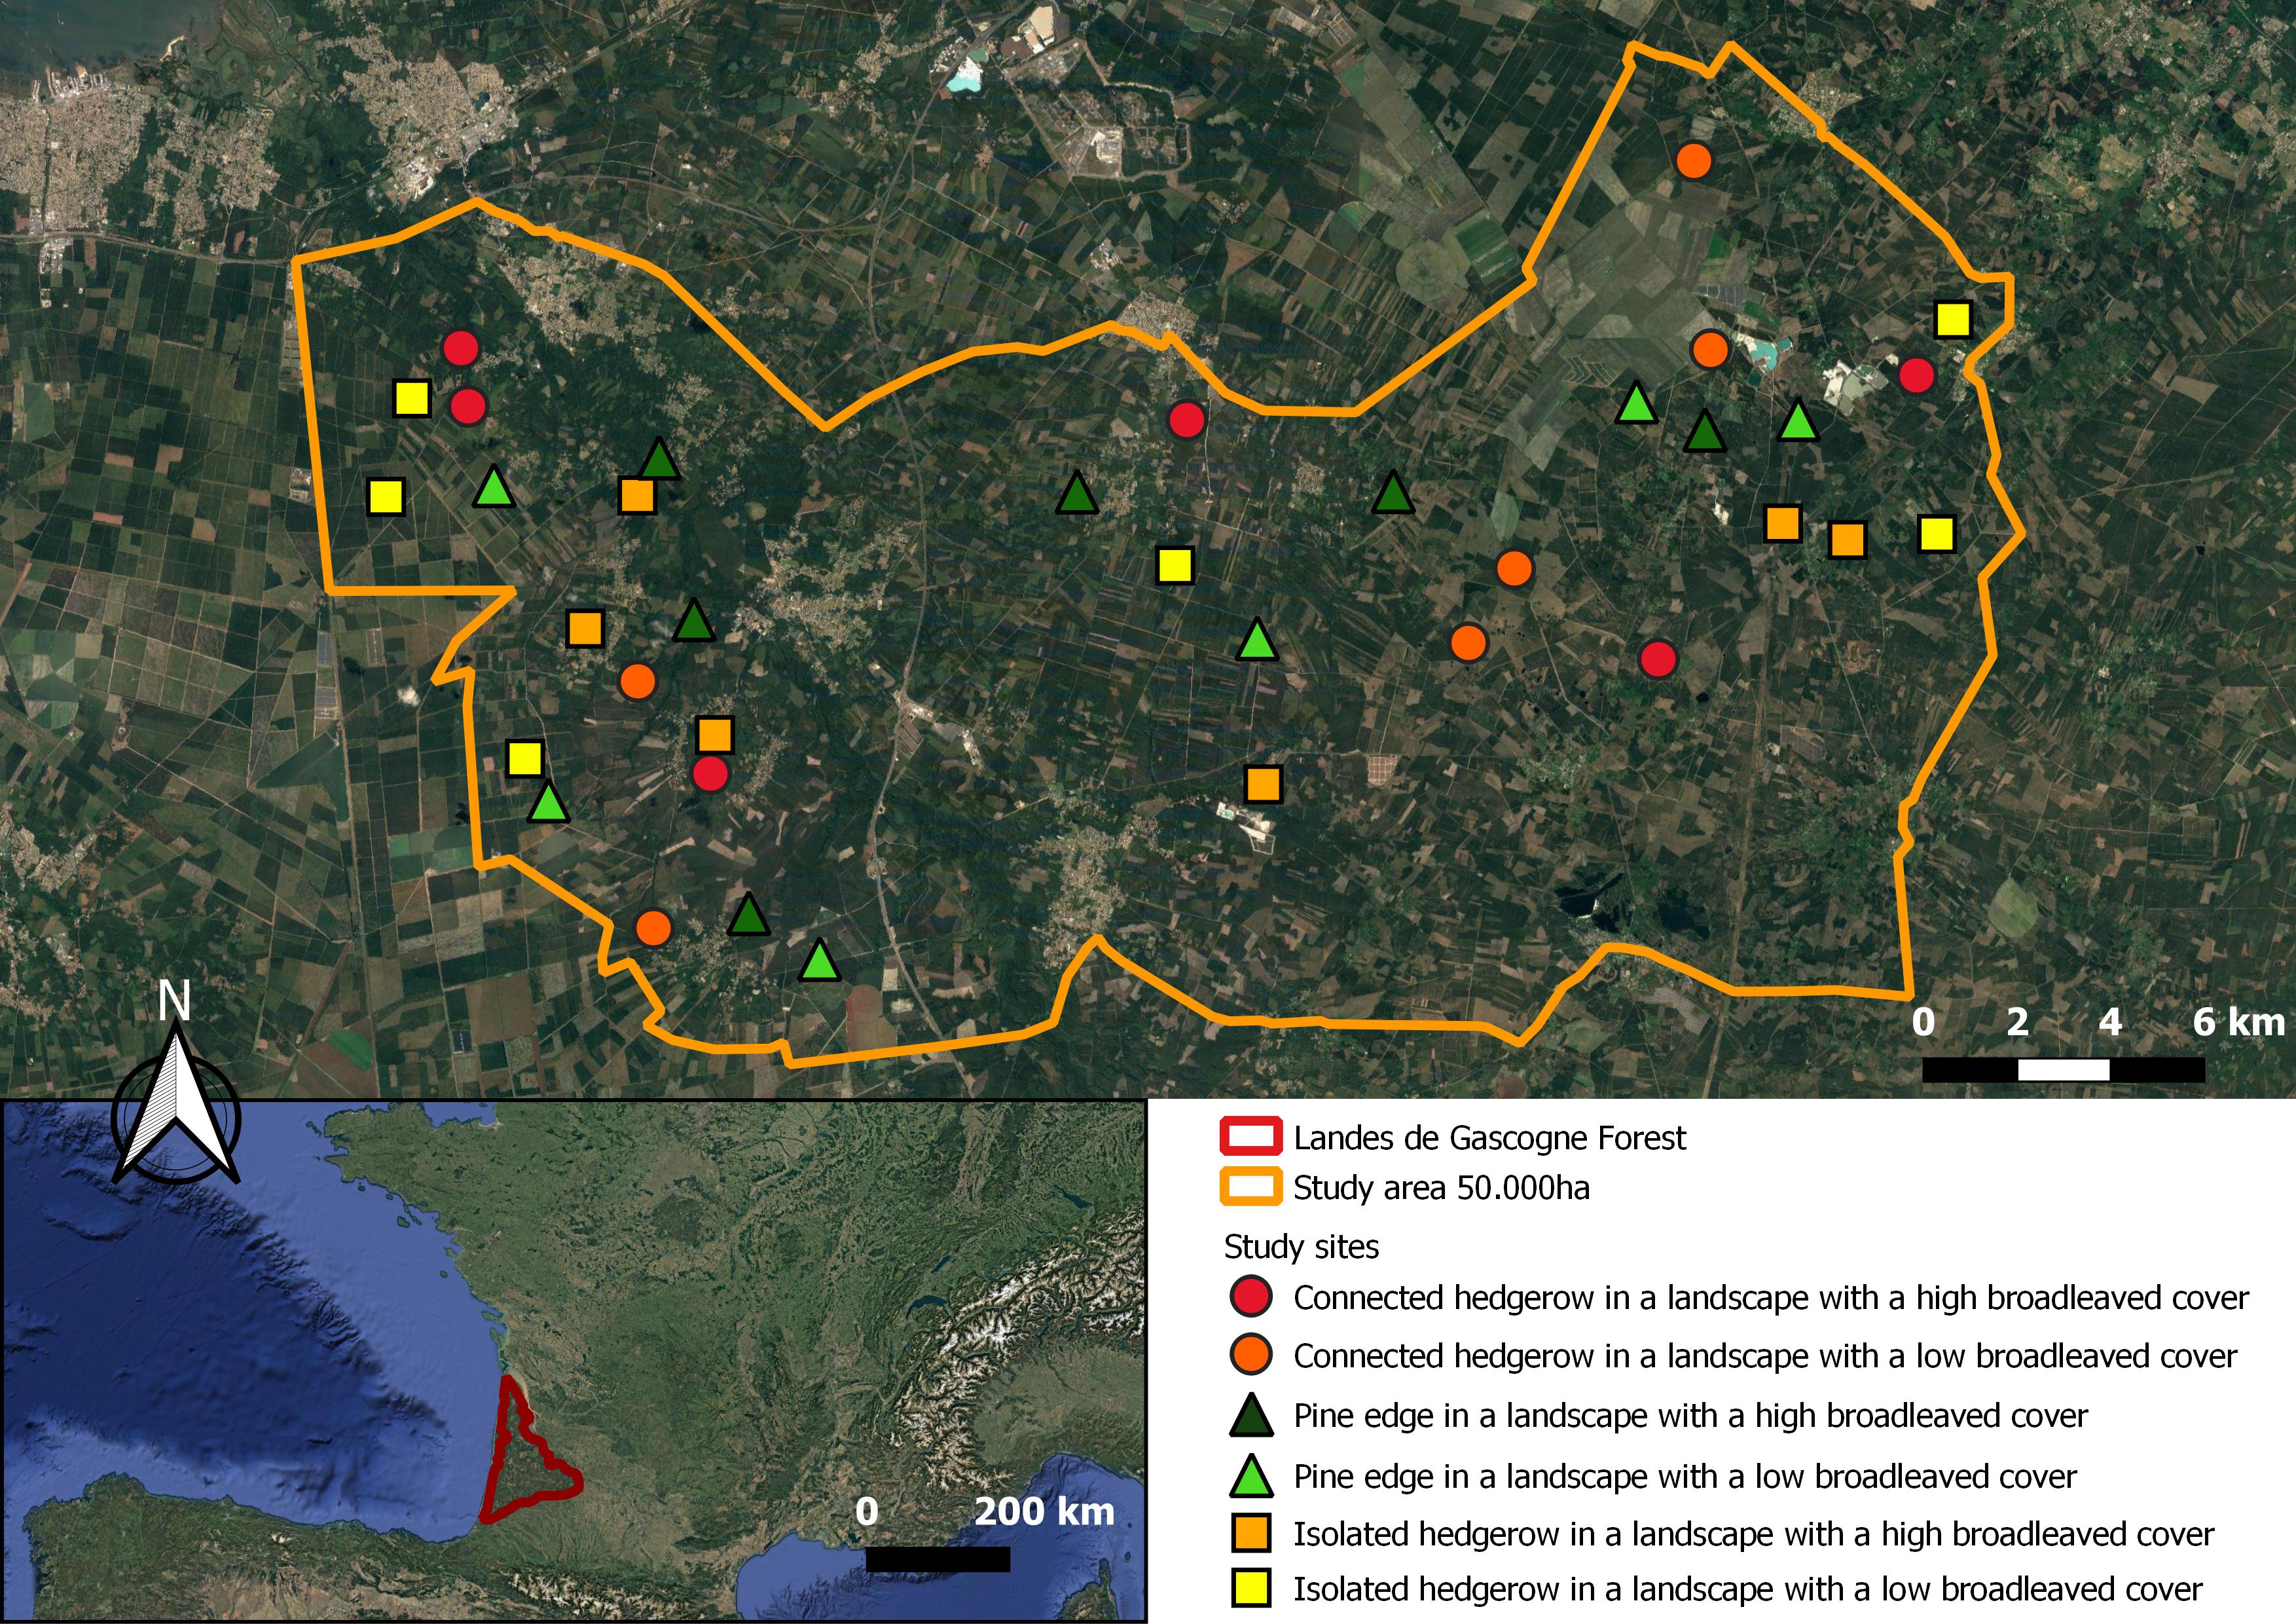


**Figure S1 :** Map of the study area (50 000ha). Circles, triangles and squares show the location of study sites and the corresponding modalities. Bottom left map shows the location of the “Landes de Gascogne Forest” in southwest Europe. The background map comes from Google Map (Google Maps, 2025).


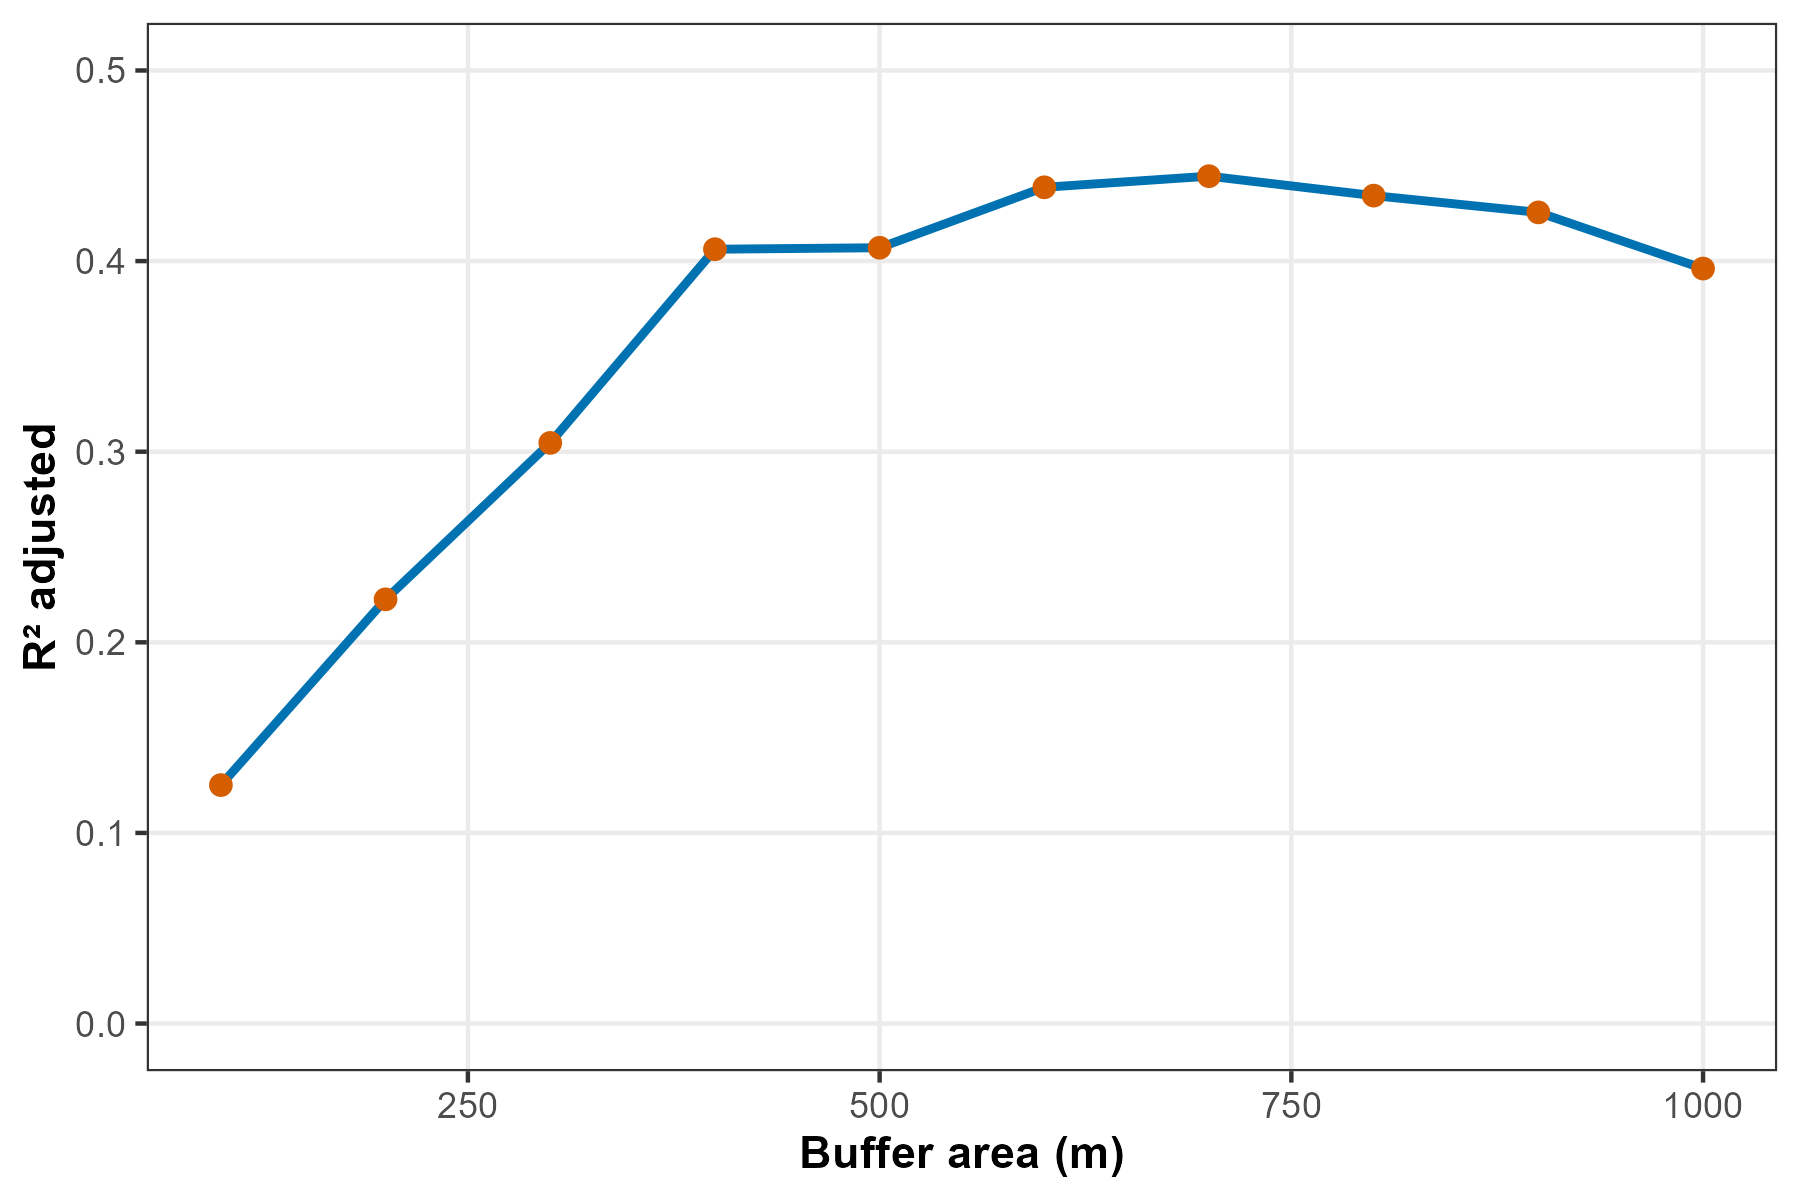


**Figure S2:** Correlation between buffer area and R² adjusted. Each red point correspond to one of the 10 linear models using multidiversity as a response variable, with broadleaved cover measured at buffer distances ranging from 100 m to 1000 m in 100 m increments as explanatory variable.

**Table S1:** Summary of LM testing the correlation between the broadleaved cover in a 500m buffer and the broadleaved cover in buffers from 400 to 1000m. Significant variables are indicated in bold. Sample size was n=36 sites.

| Response variable | Predictors | x2 | Df | Coeff. ± SE | P | R² adj |
| --- | --- | --- | --- | --- | --- | --- |
| Broadleaved cover in a 500m buffer | **Broadleaved cover in a 400m buffer** | 2773 | 1 | 1.14 ± 0.04 | **<0.001** | 0.94 |
| Broadleaved cover in a 500m buffer | **Broadleaved cover in a 600m buffer** | 2858 | 1 | 0.97 ± 0.02 | **<0.001** | 0.97 |
| Broadleaved cover in a 500m buffer | **Broadleaved cover in a 700m buffer** | 2701 | 1 | 0.98 ± 0.05 | **<0.001** | 0.92 |
| Broadleaved cover in a 500m buffer | **Broadleaved cover in a 800m buffer** | 2500 | 1 | 0.97 ± 0.07 | **<0.001** | 0.84 |
| Broadleaved cover in a 500m buffer | **Broadleaved cover in a 900m buffer** | 2320 | 1 | 0.97 ± 0.08 | **<0.001** | 0.78 |
| Broadleaved cover in a 500m buffer | **Broadleaved cover in a 1000m buffer** | 2234 | 1 | 0.99 ± 0.09 | **<0.001** | 0.75 |


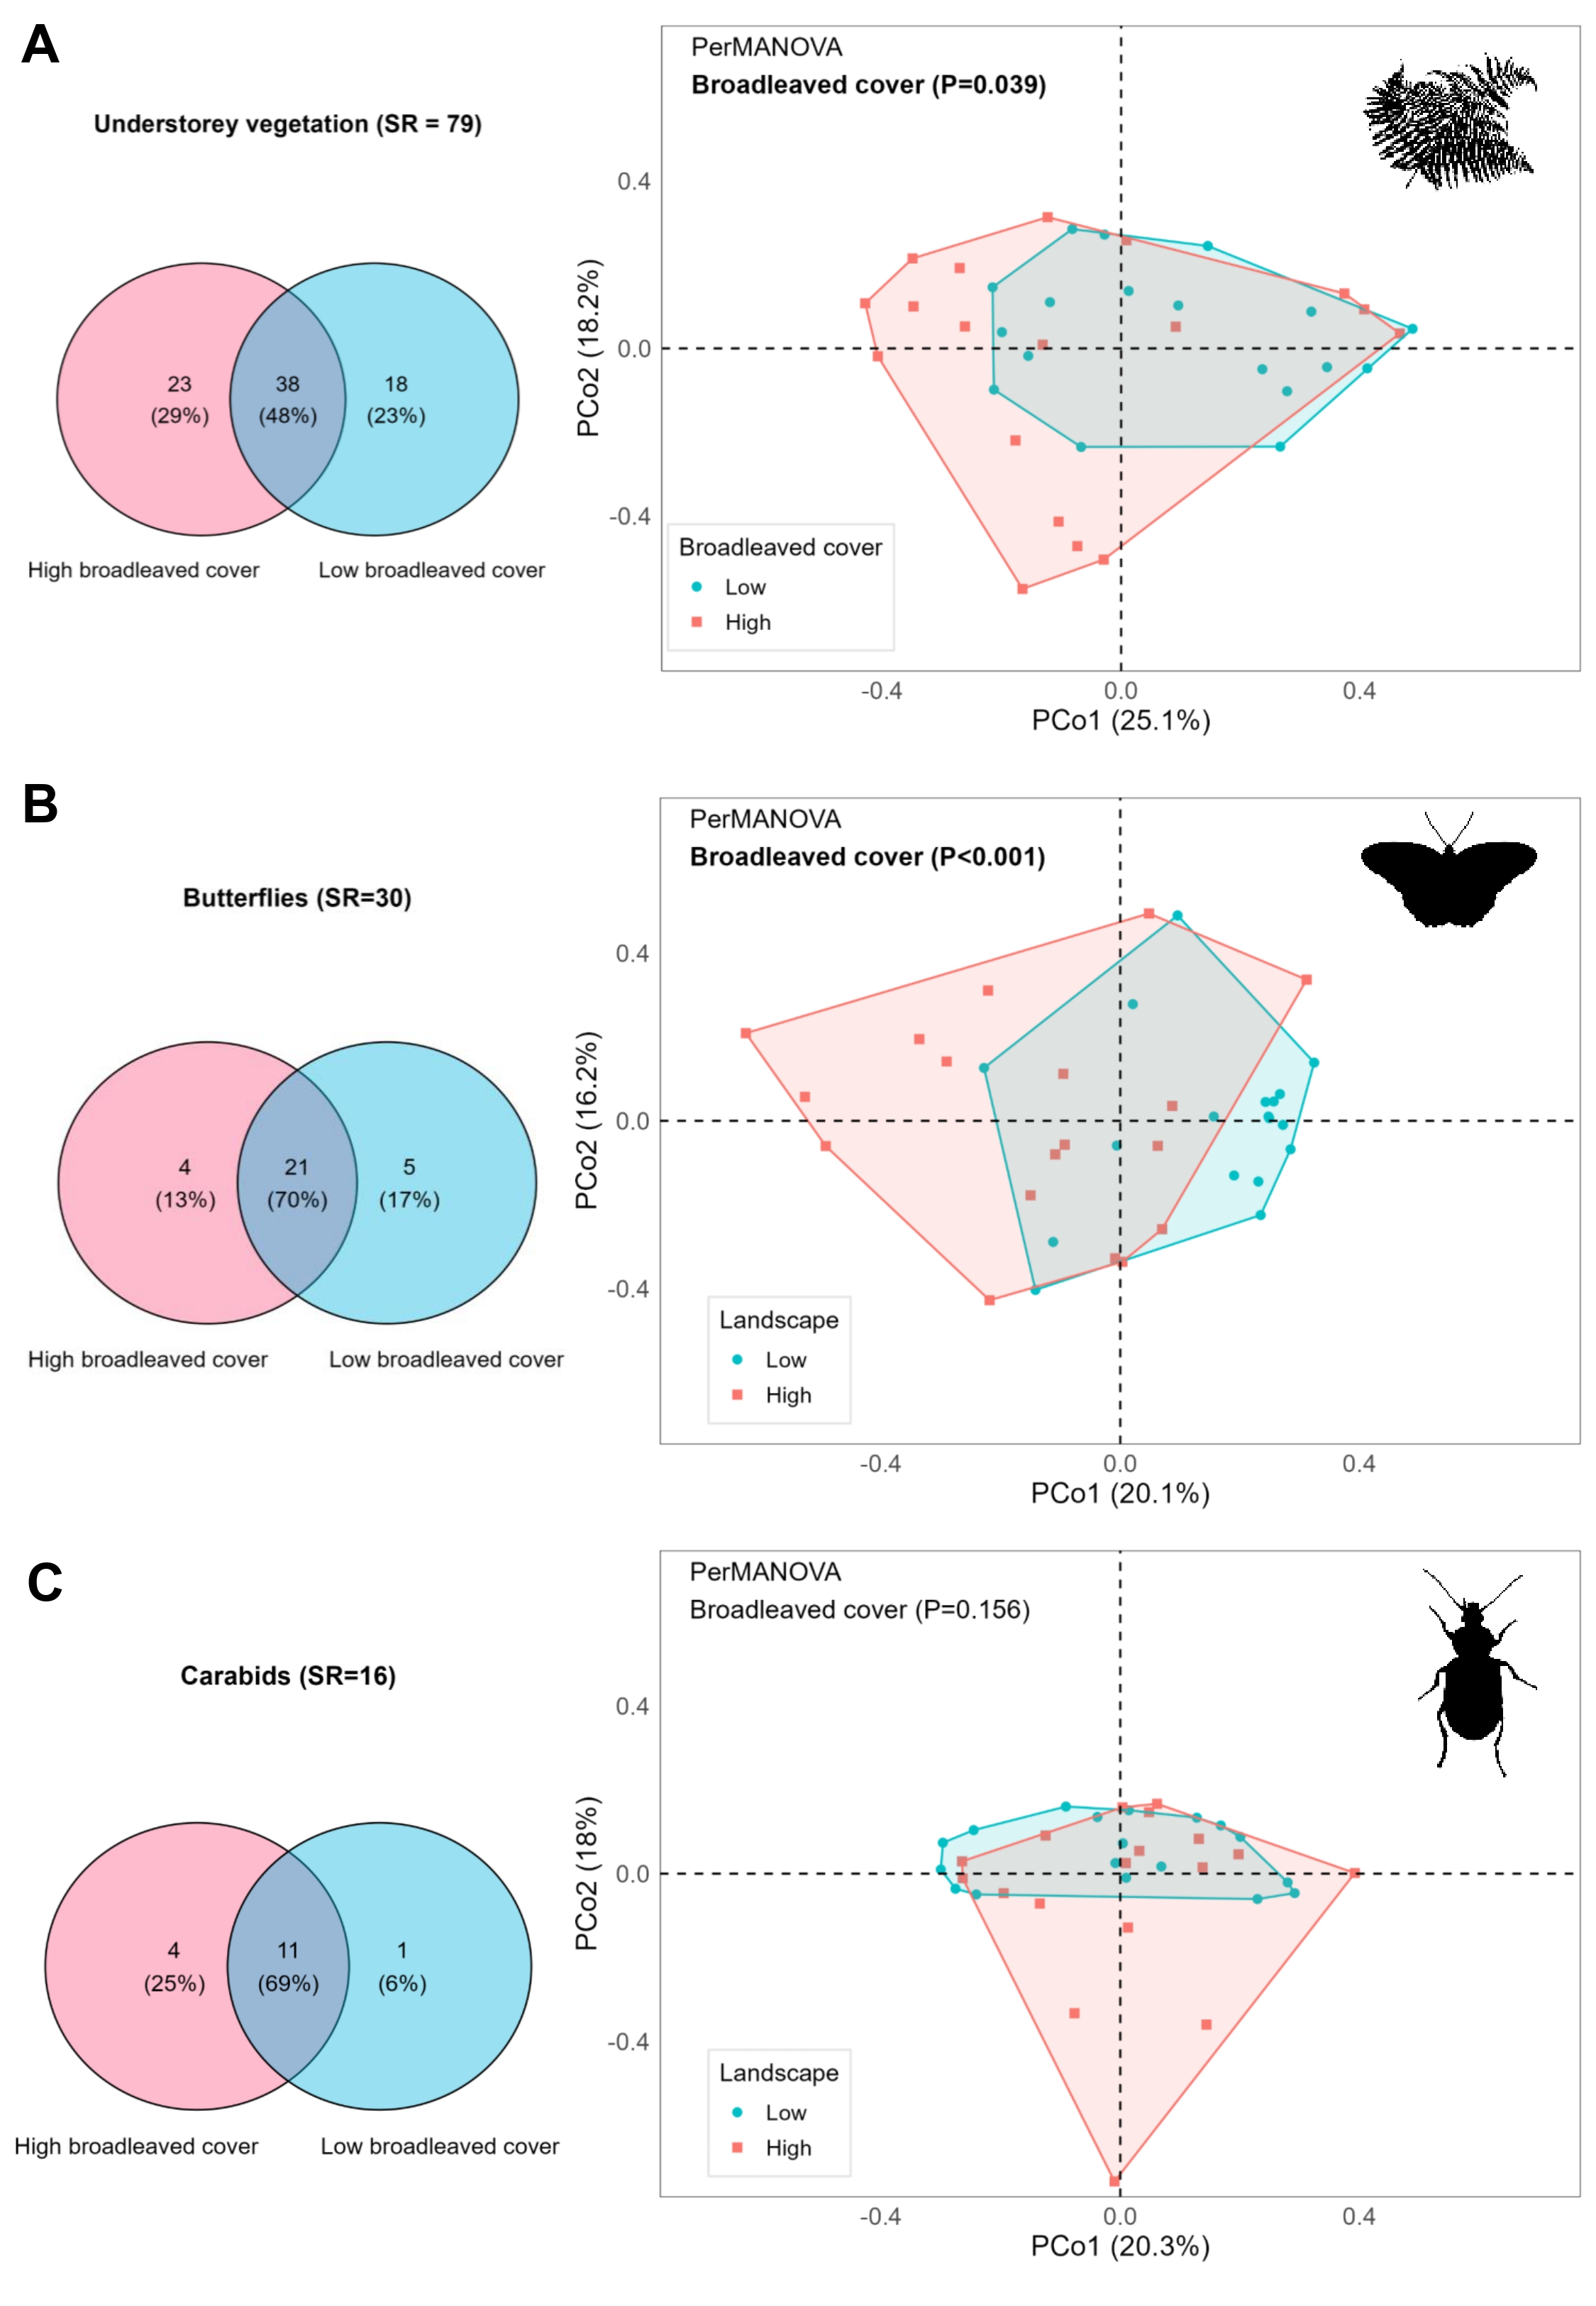


**Figure S3 :** Venn diagrams showing species presence in each broadleaved cover modality and PCoA showing difference between study sites communities depending on broadleaved cover modality and for (A) understorey vegetation, (B) butterflies, (C) carabids, (D) spiders, (E) birds and (F) reptiles. Significant differences in community composition were tested using PerMANOVAs. Communities are based on Bray Curtis dissimilarity matrix with Hellinger transformation. Sample size was n=36 sites.


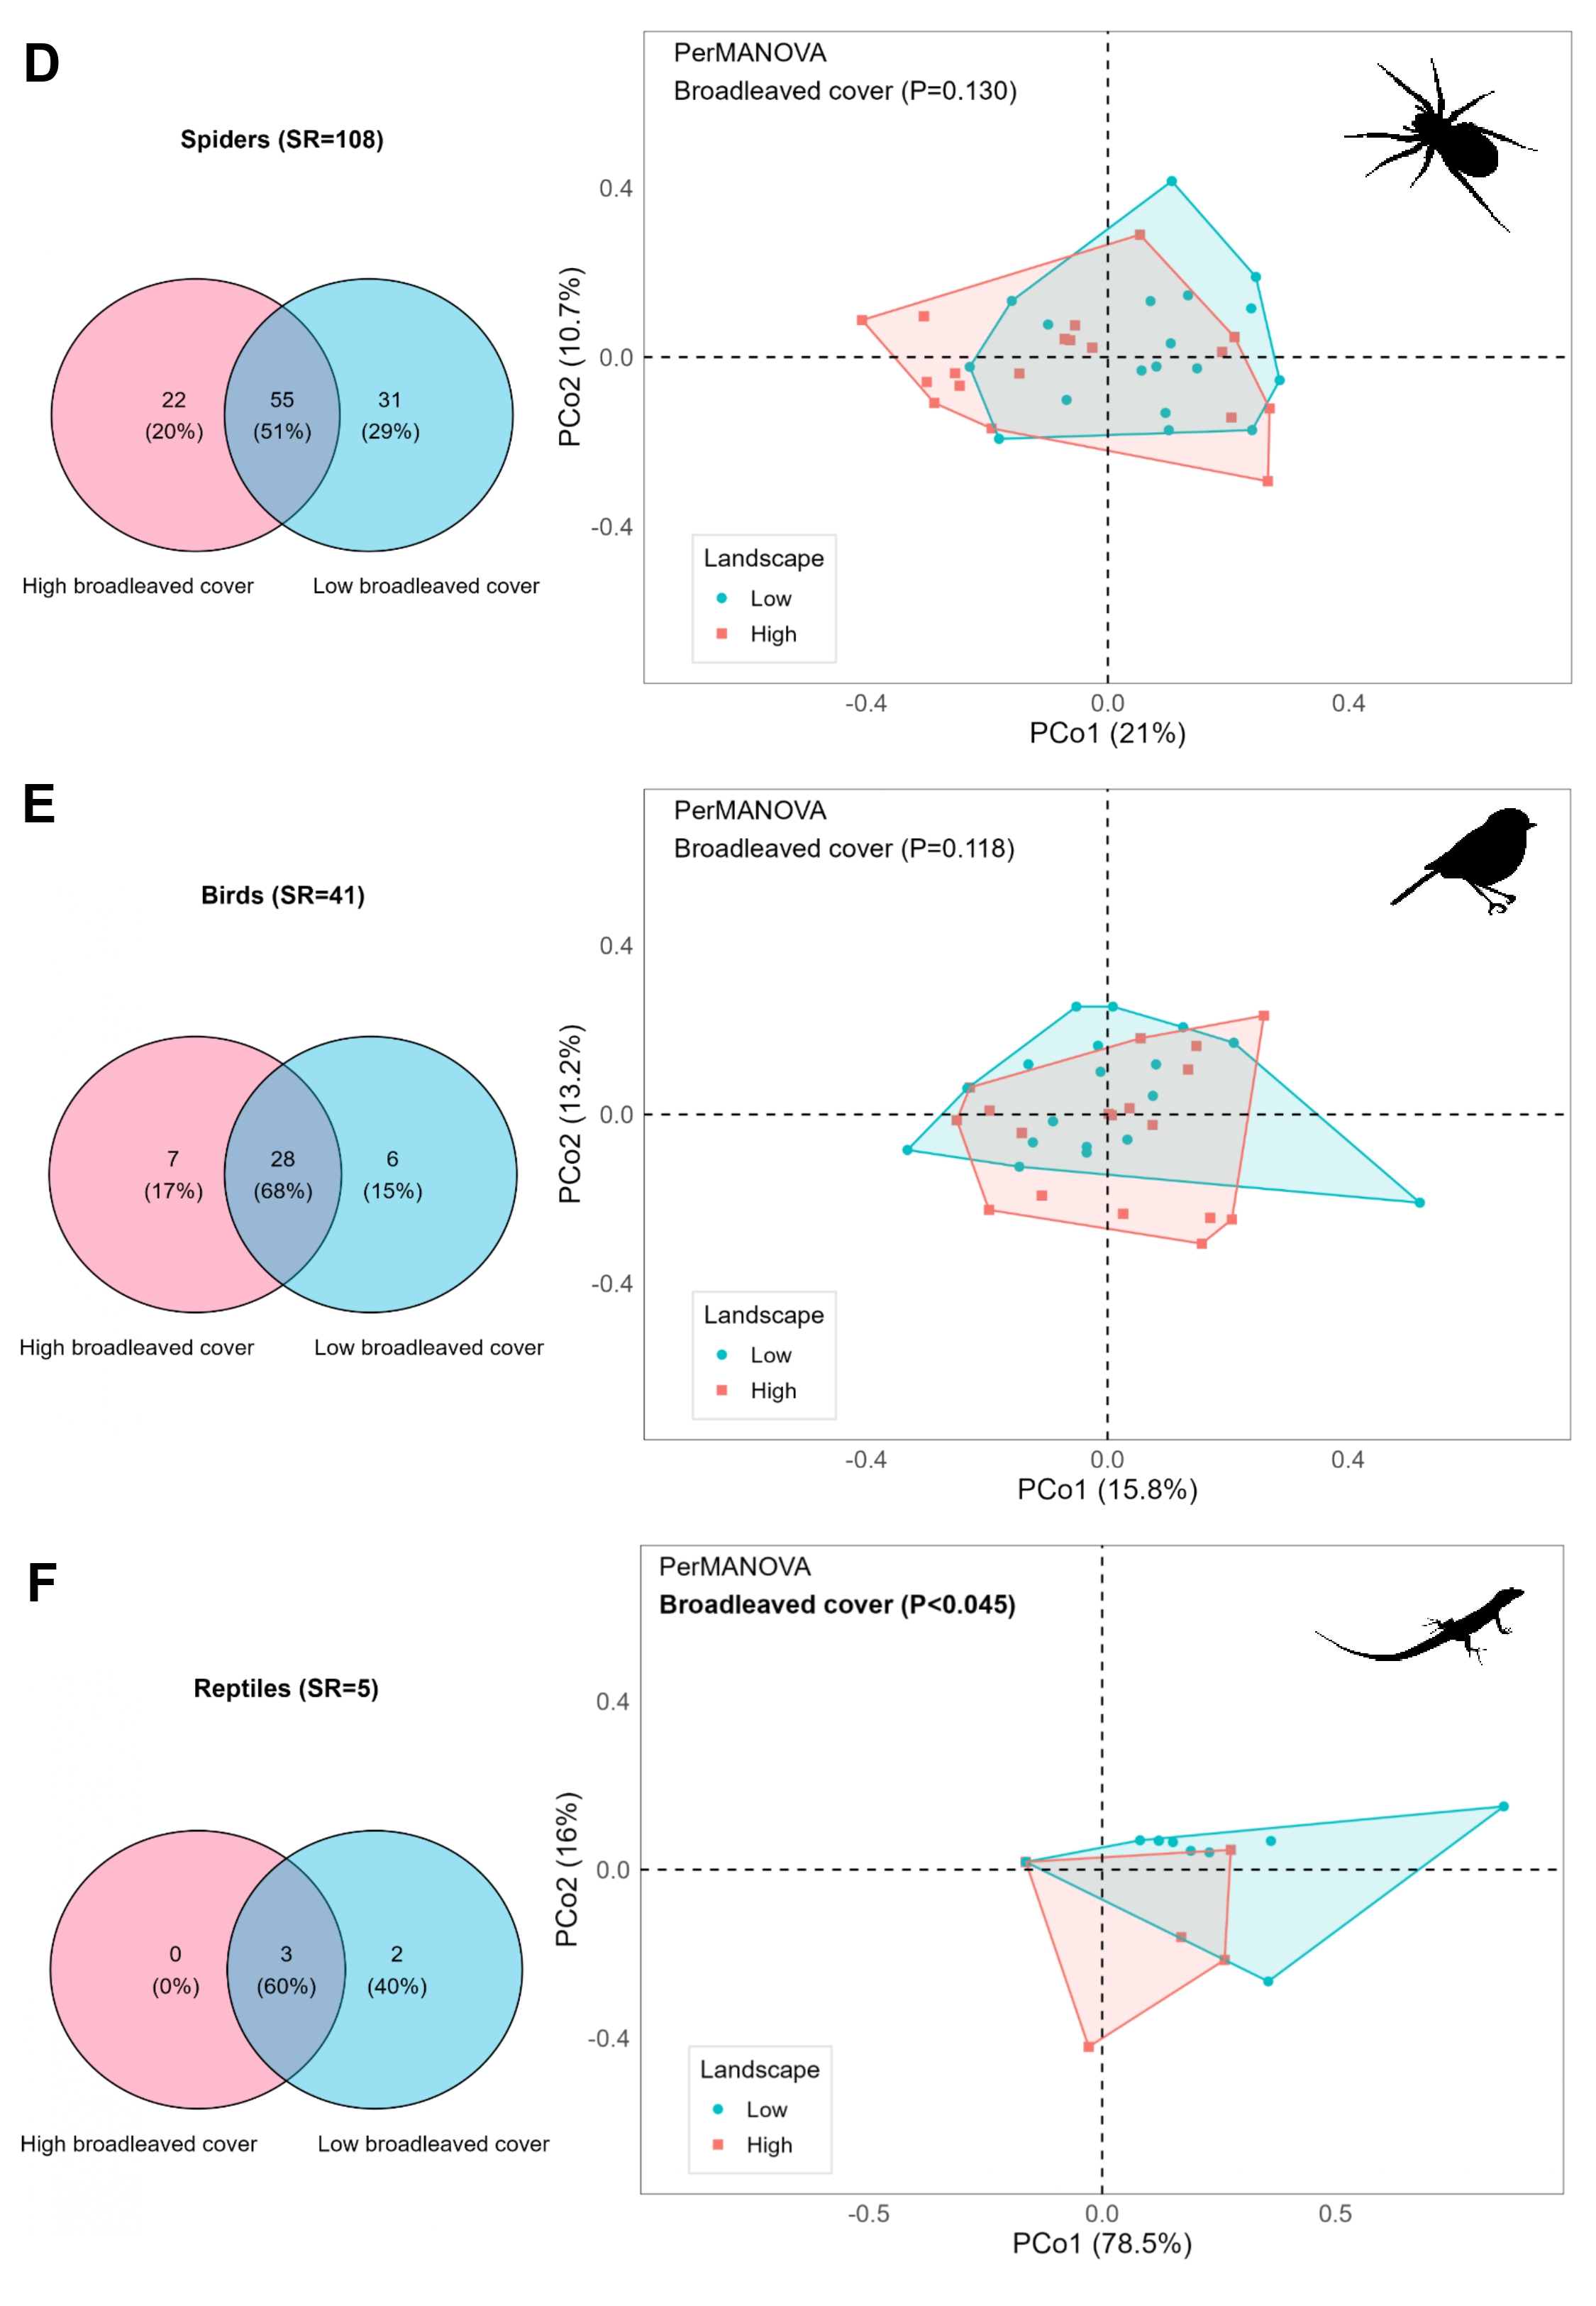


**Table S2 :** List of species identified in the Living Lab based on a multi-taxonomic sampling (6 groups) of 36 study sites.

| Group | Genus | Species | Forest species | Redlist Category | Dominance |
| --- | --- | --- | --- | --- | --- |
| Bird | Anthus | trivialis | 0 | Least Concern | Locally dominant |
| Bird | Columba | palumbus | 0 | Least Concern | Locally dominant |
| Bird | Dendrocopos | major | 1 | Least Concern | Locally dominant |
| Bird | Dryocopus | martius | 1 | Least Concern | Locally dominant |
| Bird | Hirundo | rustica | 0 | Least Concern | Locally dominant |
| Bird | Lophophanes | cristatus | 1 | Least Concern | Locally dominant |
| Bird | Luscinia | megarhynchos | 0 | Least Concern | Locally dominant |
| Bird | Parus | major | 0 | Least Concern | Locally dominant |
| Bird | Phoenicurus | phoenicurus | 0 | Least Concern | Rare |
| Bird | Picus | viridis | 0 | Least Concern | Locally dominant |
| Bird | Regulus | ignicapilla | 1 | Least Concern | Locally dominant |
| Bird | Streptopelia | decaocto | 0 | Least Concern | Locally dominant |
| Bird | Sylvia | atricapilla | 0 | Least Concern | Locally dominant |
| Bird | Turdus | merula | 0 | Least Concern | Locally dominant |
| Bird | Turdus | philomelos | 1 | Least Concern | Locally dominant |
| Bird | Turdus | viscivorus | 1 | Least Concern | Locally dominant |
| Bird | Upupa | epops | 0 | Least Concern | Locally dominant |
| Bird | Aegithalos | caudatus | 0 | Least Concern | Rare |
| Bird | Alauda | arvensis | 0 | Least Concern | Rare |
| Bird | Buteo | buteo | 0 | Least Concern | Rare |
| Bird | Certhia | brachydactyla | 1 | Least Concern | Rare |
| Bird | Corvus | corone | 0 | Least Concern | Rare |
| Bird | Curruca | undata | 0 | Near Threatened | Rare |
| Bird | Cyanistes | caeruleus | 0 | Least Concern | Rare |
| Bird | Garrulus | glandarius | 0 | Least Concern | Rare |
| Bird | Hippolais | polyglotta | 0 | Least Concern | Rare |
| Bird | Locustella | naevia | 0 | Least Concern | Rare |
| Bird | Lullula | arborea | 0 | Least Concern | Rare |
| Bird | Phasianus | colchicus | 0 | Least Concern | Rare |
| Bird | Phylloscopus | bonelli | 1 | Least Concern | Rare |
| Bird | Pica | pica | 0 | Least Concern | Rare |
| Bird | Prunella | modularis | 0 | Least Concern | Rare |
| Bird | Pyrrhula | pyrrhula | 1 | Least Concern | Rare |
| Bird | Sitta | europaea | 1 | Least Concern | Rare |
| Bird | Streptopelia | turtur | 0 | Vulnerable | Rare |
| Bird | Sylvia | communis | 0 | Least Concern | Rare |
| Bird | Cuculus | canorus | 0 | Least Concern | Regionally dominant |
| Bird | Erithacus | rubecula | 1 | Least Concern | Regionally dominant |
| Bird | Fringilla | coelebs | 0 | Least Concern | Regionally dominant |
| Bird | Phylloscopus | collybita | 1 | Least Concern | Regionally dominant |
| Bird | Troglodytes | troglodytes | 1 | Least Concern | Regionally dominant |
| Butterfly | Argynnis | paphia | 1 | Least Concern | Rare |
| Butterfly | Coenonympha | arcania | 0 | Least Concern | Rare |
| Butterfly | Celastrina | argiolus | 0 | Least Concern | Rare |
| Butterfly | Coenonympha | oedippus | 0 | Near Threatened | Locally dominant |
| Butterfly | Coenonympha | pamphilus | 0 | Least Concern | Locally dominant |
| Butterfly | Euphydryas | aurinia | 0 | Least Concern | Locally dominant |
| Butterfly | Gonepteryx | rhamni | 0 | Least Concern | Locally dominant |
| Butterfly | Hipparchia | semele | 0 | Least Concern | Rare |
| Butterfly | Lasiommata | megera | 0 | Least Concern | Rare |
| Butterfly | Limenitis | reducta | 1 | Least Concern | Rare |
| Butterfly | Melitaea | athalia | 0 | Least Concern | Rare |
| Butterfly | Minois | dryas | 0 | Least Concern | Locally dominant |
| Butterfly | Pararge | aegeria | 1 | Least Concern | Rare |
| Butterfly | Quercusia | quercus | 1 | Least Concern | Rare |
| Butterfly | Thymelicus | sylvestris | 0 | Vulnerable | Rare |
| Butterfly | Aricia | agestis | 0 | Least Concern | Rare |
| Butterfly | Brintesia | circe | 0 | Least Concern | Rare |
| Butterfly | Cupido | argiades | 0 | Least Concern | Rare |
| Butterfly | Colias | crocea | 0 | Least Concern | Rare |
| Butterfly | Heteropterus | morpheus | 0 | Least Concern | Rare |
| Butterfly | Lampides | boeticus | 0 | Least Concern | Rare |
| Butterfly | Melanargia | galathea | 0 | Least Concern | Rare |
| Butterfly | Satyrium | ilicis | 1 | Least Concern | Rare |
| Butterfly | Ochlodes | sylvanus | 0 | Least Concern | Rare |
| Butterfly | Polyommatus | icarus | 0 | Least Concern | Rare |
| Butterfly | Pieris | napi | 0 | Least Concern | Rare |
| Butterfly | Vanessa | atalanta | 0 | Least Concern | Rare |
| Butterfly | Lycaena | phlaeas | 0 | Least Concern | Regionally dominant |
| Butterfly | Maniola | jurtina | 0 | Least Concern | Regionally dominant |
| Butterfly | Pyronia | tithonus | 0 | Least Concern | Regionally dominant |
| Carabid | Abax | parallelepipedus | 1 | NA | Locally dominant |
| Carabid | Amara | Spp. | 0 | NA | Rare |
| Carabid | Carabus | granulatus | 1 | NA | Rare |
| Carabid | Carabus | nemoralis | 0 | NA | Locally dominant |
| Carabid | Harpalus | rubripes | 0 | NA | Rare |
| Carabid | Harpalus | rufipalpis | 0 | NA | Locally dominant |
| Carabid | Harpalus | smaragdinus | 0 | NA | Rare |
| Carabid | Notiophilus | bigutattus | 0 | NA | Locally dominant |
| Carabid | Pterostichus | gallega | 1 | NA | Locally dominant |
| Carabid | Synuchus | vivalis | 1 | NA | Rare |
| Carabid | Nebria | salina | 0 | NA | Rare |
| Carabid | Notiophilus | germinyi | 0 | NA | Rare |
| Carabid | Paranchus | albipes | 0 | NA | Rare |
| Carabid | Poecilus | versicolor | 1 | NA | Rare |
| Carabid | Carabus | problematicus | 1 | NA | Locally dominant |
| Carabid | Carabus | violaceus purpuracens | 1 | NA | Landscape dominant |
| Reptile | Hierophis | viridiflavus | 0 | Least Concern | Rare |
| Reptile | Natrix | helvetica | 0 | Least Concern | Rare |
| Reptile | Vipera | aspis | 0 | Vulnerable | Rare |
| Reptile | Lacerta | bilineata | 0 | Least Concern | Rare |
| Reptile | Podarcis | muralis | 0 | Least Concern | Regionally dominant |
| Spider | Alopecosa | pulverulenta | 0 | NA | Locally dominant |
| Spider | Atypus | affinis | 0 | NA | Locally dominant |
| Spider | Aulonia | albimana | 0 | NA | Locally dominant |
| Spider | Bassaniodes | robustus | 0 | NA | Rare |
| Spider | Callilepis | schuszteri | 0 | NA | Rare |
| Spider | Civizelotes | civicus | NA | NA | Locally dominant |
| Spider | Drassyllus | villicus | 0 | NA | Rare |
| Spider | Gnaphosa | alpica | NA | NA | Locally dominant |
| Spider | Haplodrassus | silvestris | 1 | NA | Locally dominant |
| Spider | Haplodrassus | umbratilis | 1 | NA | Rare |
| Spider | Pardosa | hortensis | 0 | NA | Rare |
| Spider | Pardosa | proxima | NA | NA | Locally dominant |
| Spider | Pardosa | Sp | NA | NA | Rare |
| Spider | Saitis | barbipes | NA | NA | Locally dominant |
| Spider | Scotina | celans | 0 | NA | Locally dominant |
| Spider | Titanoeca | quadriguttata | 0 | NA | Rare |
| Spider | Trachyzelotes | pedestris | 0 | NA | Locally dominant |
| Spider | Trichoncus | hackmani | 0 | NA | Locally dominant |
| Spider | Trochosa | terricola | 0 | NA | Locally dominant |
| Spider | Zelotes | aeneus | 0 | NA | Locally dominant |
| Spider | Zelotes | apricorum | 0 | NA | Locally dominant |
| Spider | Zelotes | gallicus | NA | NA | Locally dominant |
| Spider | Zora | spinimana | 0 | NA | Locally dominant |
| Spider | Aelurillus | v-insignitus | 0 | NA | Rare |
| Spider | Agroeca | brunnea | 1 | NA | Rare |
| Spider | Agroeca | inopina | NA | NA | Rare |
| Spider | Agroeca | proxima | 0 | NA | Rare |
| Spider | Agyneta | fuscipalpus | NA | NA | Rare |
| Spider | Agyneta | rurestris | 0 | NA | Rare |
| Spider | Agyneta | saxatilis | 0 | NA | Rare |
| Spider | Alopecosa | albofasciata | NA | NA | Rare |
| Spider | Anyphaena | accentuata | 1 | NA | Rare |
| Spider | Aphantaulax | trifasciata | NA | NA | Rare |
| Spider | Arctosa | figurata | 0 | Near Threatened | Rare |
| Spider | Centromerus | sylvaticus | 0 | NA | Rare |
| Spider | Ceratinella | scabrosa | 1 | NA | Rare |
| Spider | Cercidia | prominens | 0 | NA | Rare |
| Spider | Clubiona | comta | 1 | NA | Rare |
| Spider | Cozyptila | blackwalli | 1 | NA | Rare |
| Spider | Crustulina | guttata | 0 | NA | Rare |
| Spider | Diplostyla | concolor | 0 | NA | Rare |
| Spider | Drassodes | cupreus | 0 | NA | Rare |
| Spider | Drassodes | lapidosus | 0 | NA | Rare |
| Spider | Drassodes | pubescens | 0 | NA | Rare |
| Spider | Drassyllus | praeficus | 0 | NA | Rare |
| Spider | Drassyllus | pusillus | 0 | NA | Rare |
| Spider | Dysdera | erythrina | 0 | NA | Rare |
| Spider | Dysdera | fuscipes | NA | Endangered | Rare |
| Spider | Enoplognatha | thoracia | NA | NA | Rare |
| Spider | Euophrys | frontalis | 0 | NA | Rare |
| Spider | Euryopis | flavomaculata | 0 | NA | Rare |
| Spider | Evarcha | arcuata | 0 | NA | Rare |
| Spider | Haplodrassus | signifer | 0 | NA | Rare |
| Spider | Heliophanus | cupreus | 0 | NA | Rare |
| Spider | Heliophanus | tribulosus | NA | NA | Rare |
| Spider | Hogna | radiata | NA | NA | Rare |
| Spider | Iberina | candida | NA | NA | Rare |
| Spider | Kishidaia | conspicua | 1 | NA | Rare |
| Spider | Liocranoeca | striata | 1 | NA | Rare |
| Spider | Liocranum | rupicola | 0 | NA | Rare |
| Spider | Micaria | fulgens | 0 | NA | Rare |
| Spider | Microneta | viaria | 1 | NA | Rare |
| Spider | Ozyptila | atomaria | 0 | NA | Rare |
| Spider | Ozyptila | praticola | 1 | NA | Rare |
| Spider | Palliduphantes | alutacius | 1 | NA | Rare |
| Spider | Palliduphantes | pallidus | 0 | NA | Rare |
| Spider | Parapelecopsis | nemoralioides | NA | NA | Rare |
| Spider | Pelecopsis | parallela | 0 | NA | Rare |
| Spider | Peponocranium | ludicrum | NA | NA | Rare |
| Spider | Phlegra | fasciata | 0 | NA | Rare |
| Spider | Pholcomma | gibbum | 1 | NA | Rare |
| Spider | Phrurolithus | festivus | 0 | NA | Rare |
| Spider | Phrurolithus | minimus | 0 | NA | Rare |
| Spider | Piratula | hygrophila | 0 | NA | Rare |
| Spider | Pisaura | mirabilis | 0 | NA | Rare |
| Spider | Pocadicnemis | jacksoni | NA | NA | Rare |
| Spider | Pocadicnemis | juncea | 0 | NA | Rare |
| Spider | Pocadicnemis | pumila | 0 | NA | Rare |
| Spider | Robertus | mediterraneus | NA | NA | Rare |
| Spider | Scotophaeus | nanoides | NA | NA | Rare |
| Spider | Scotina | palliardii | 0 | NA | Rare |
| Spider | Talavera | inopinata | NA | NA | Rare |
| Spider | Tenuiphantes | flavipes | 0 | NA | Rare |
| Spider | Tenuiphantes | spiniger | NA | NA | Rare |
| Spider | Tenuiphantes | tenuis | 0 | NA | Rare |
| Spider | Tenuiphantes | zimmermanni | 1 | NA | Rare |
| Spider | Thanatus | sabulosus | 0 | NA | Rare |
| Spider | Theonina | cornix | 0 | NA | Rare |
| Spider | Theonoe | minutissima | 0 | NA | Rare |
| Spider | Trochosa | spinipalpis | 0 | NA | Rare |
| Spider | Walckenaeria | acuminata | 0 | NA | Rare |
| Spider | Walckenaeria | atrotibialis | 0 | NA | Rare |
| Spider | Walckenaeria | cucullata | 1 | NA | Rare |
| Spider | Walckenaeria | furcillata | 1 | NA | Rare |
| Spider | Walckenaeria | languida | NA | NA | Rare |
| Spider | Wiehlea | calcarifera | NA | NA | Rare |
| Spider | Xerolycosa | nemoralis | 0 | NA | Rare |
| Spider | Xysticus | erraticus | 0 | NA | Rare |
| Spider | Xysticus | kempeleni | 0 | NA | Rare |
| Spider | Xysticus | kochi | 0 | NA | Rare |
| Spider | Zelotes | erebeus | 0 | NA | Rare |
| Spider | Zelotes | latreillei | 0 | NA | Rare |
| Spider | Zelotes | patrensis | NA | NA | Rare |
| Spider | Zodarion | fuscum | NA | NA | Rare |
| Spider | Zodarion | machadoi | NA | NA | Rare |
| Spider | Zora | nemoralis | 1 | NA | Rare |
| Spider | Pardosa | lugubris | 0 | NA | Regionally dominant |
| Spider | Zodarion | italicum | 0 | NA | Regionally dominant |
| Understorey vegetation | Agrostis | capillaris | 0 | NA | Rare |
| Understorey vegetation | Calluna | vulgaris | 0 | Least Concern | Locally dominant |
| Understorey vegetation | Castanea | sativa | 1 | Least Concern | Locally dominant |
| Understorey vegetation | Crataegus | monogyna | 0 | Least Concern | Locally dominant |
| Understorey vegetation | Avenella | flexuosa | 0 | NA | Locally dominant |
| Understorey vegetation | Erica | cinerera | 0 | NA | Locally dominant |
| Understorey vegetation | Erica | scoparia | 0 | NA | Locally dominant |
| Understorey vegetation | Fraxinus | excelsior | 0 | Near Threatened | Rare |
| Understorey vegetation | Hedera | helix | 0 | Least Concern | Locally dominant |
| Understorey vegetation | Ilex | aquifolium | 1 | Least Concern | Locally dominant |
| Understorey vegetation | Lonicera | periclymenum | 0 | NA | Locally dominant |
| Understorey vegetation | Phytolacca | americana | 0 | NA | Rare |
| Understorey vegetation | Prunus | serotina | 0 | NA | Locally dominant |
| Understorey vegetation | Pseudarrhenaterum | longifolium | 0 | NA | Locally dominant |
| Understorey vegetation | Frangula | alnus | 0 | Least Concern | Locally dominant |
| Understorey vegetation | Rubus | fruticosus | 0 | Least Concern | Locally dominant |
| Understorey vegetation | Ulex | europaeus | 0 | Least Concern | Locally dominant |
| Understorey vegetation | Ulex | minor | 0 | Least Concern | Locally dominant |
| Understorey vegetation | Acer | negundo | 0 | NA | Rare |
| Understorey vegetation | Aira | caryphyllea | 0 | NA | Rare |
| Understorey vegetation | Aira | praecox | 0 | NA | Rare |
| Understorey vegetation | Alnus | glutinosa | 0 | Least Concern | Rare |
| Understorey vegetation | Anthoxanthum | odoratum | 0 | NA | Rare |
| Understorey vegetation | Arbutus | unedo | 0 | Least Concern | Rare |
| Understorey vegetation | Arenaria | montana | 0 | NA | Rare |
| Understorey vegetation | Aster | sp | 0 | NA | Rare |
| Understorey vegetation | Betula | pendula | 0 | Least Concern | Rare |
| Understorey vegetation | Betula | pubescens | 0 | Least Concern | Rare |
| Understorey vegetation | Calystegia | sepium | 0 | NA | Rare |
| Understorey vegetation | Carex | arenaria | 0 | NA | Rare |
| Understorey vegetation | Carex | sylvatica | 1 | NA | Rare |
| Understorey vegetation | Chenopodium | sp | 0 | NA | Rare |
| Understorey vegetation | Cistus | lasianthus | 0 | NA | Rare |
| Understorey vegetation | Cytisus | hirsutus | 0 | NA | Rare |
| Understorey vegetation | Danthonia | decumbens | 0 | NA | Rare |
| Understorey vegetation | Erica | tetralix | 0 | NA | Rare |
| Understorey vegetation | Erigeron | canadensis | 0 | NA | Rare |
| Understorey vegetation | Eupatorium | cannabium | 0 | NA | Rare |
| Understorey vegetation | Galium | aparine | 0 | Least Concern | Rare |
| Understorey vegetation | Holcus | lanatus | 0 | NA | Rare |
| Understorey vegetation | Holcus | mollis | 0 | NA | Rare |
| Understorey vegetation | Hypericum | humifusum | 0 | NA | Rare |
| Understorey vegetation | Hypochaeris | radicata | 0 | NA | Rare |
| Understorey vegetation | Jasione | montana | 0 | NA | Rare |
| Understorey vegetation | Juncus | bulbosus | 0 | Least Concern | Rare |
| Understorey vegetation | Juncus | effusus | 0 | Least Concern | Rare |
| Understorey vegetation | Lapsana | communis | 0 | NA | Rare |
| Understorey vegetation | Lobelia | urens | 0 | NA | Rare |
| Understorey vegetation | Luzula | multiflora | 0 | NA | Rare |
| Understorey vegetation | Lysimachia | vulgaris | 0 | Least Concern | Rare |
| Understorey vegetation | Melampyrum | pratense | 1 | NA | Rare |
| Understorey vegetation | Omalotheca | sylvatica | 0 | Least Concern | Rare |
| Understorey vegetation | Osmunda | regalis | 1 | Least Concern | Rare |
| Understorey vegetation | Polygonatum | multiflorum | 1 | NA | Rare |
| Understorey vegetation | Polypodium | vulgare | 0 | Least Concern | Rare |
| Understorey vegetation | Populus | tremula | 0 | Least Concern | Rare |
| Understorey vegetation | Potentilla | erecta | 0 | Least Concern | Rare |
| Understorey vegetation | Prunus | spinosa | 0 | Least Concern | Rare |
| Understorey vegetation | Pyrus | cordata | 1 | NA | Rare |
| Understorey vegetation | Quercus | rubra | 0 | NA | Rare |
| Understorey vegetation | Ranunculus | repens | 0 | Least Concern | Rare |
| Understorey vegetation | Robinia | pseudoacacia | 0 | NA | Rare |
| Understorey vegetation | Rubia | peregrina | 0 | NA | Rare |
| Understorey vegetation | Ruscus | aculeatus | 1 | Least Concern | Rare |
| Understorey vegetation | Salix | atrocinerea | 0 | Least Concern | Rare |
| Understorey vegetation | Senecio | sylvaticus | 1 | NA | Rare |
| Understorey vegetation | Simethis | mattiazzi | 0 | NA | Rare |
| Understorey vegetation | Solidago | virgaurea | 0 | Least Concern | Rare |
| Understorey vegetation | Sonchus | asper | 0 | NA | Rare |
| Understorey vegetation | Sonchus | oleraceus | 0 | NA | Rare |
| Understorey vegetation | Sorbus | domestica | 0 | Least Concern | Rare |
| Understorey vegetation | Stellaria | holostea | 0 | NA | Rare |
| Understorey vegetation | Dioscorea | communis | 1 | Least Concern | Rare |
| Understorey vegetation | Teucrium | scorodonia | 0 | Least Concern | Rare |
| Understorey vegetation | Tuberaria | gutata | 0 | NA | Rare |
| Understorey vegetation | Viola | sp | 0 | NA | Rare |
| Understorey vegetation | Molinia | caerulea | 0 | NA | Regionally dominant |
| Understorey vegetation | Pteridium | aquilinium | 0 | NA | Regionally dominant |
